# Supplementary material for: An efficient delivery of photosensitizers and hypoxic prodrugs for a tumor combination therapy by membrane camouflage nanoparticles
Source: Royal Society of Chemistry journal article supplement (doi:10.1039/d0tb00235f), 2020-01-01
Supplement: d0tb00235f1.pdf [file d0tb00235f1.pdf]

# Supplementary Information for

## Efficient delivery of photosensitizers and hypoxic prodrugs for tumor combination therapy by membrane camouflage nanoparticles

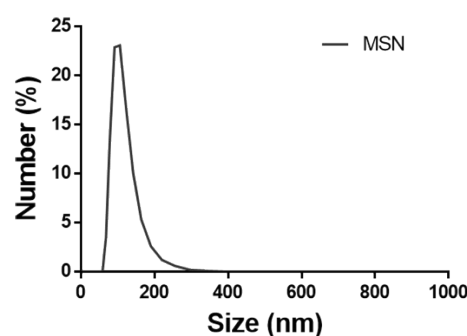

**Figure S1.** The size distribution of MSN

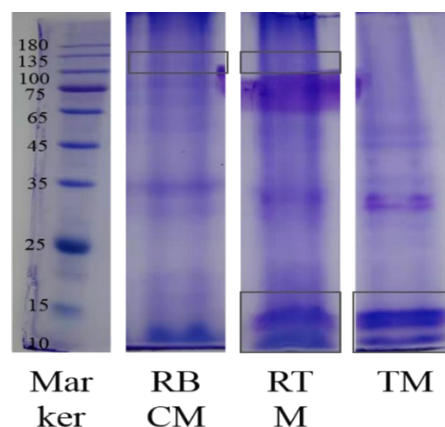

**Figure S2.** (D) SDS-PAGE analysis. The RBCM, RTM, TM (20  $\mu$ g) was resolved by 10% SDS-PAGE. Protein bands were visualized by Coomassie blue staining

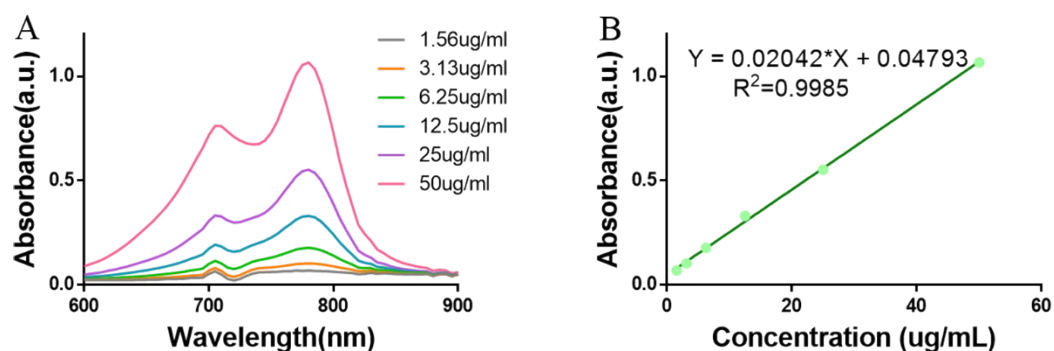

**Figure S3.** (A) UV-vis absorption spectrum of ICG content of 1.56 µg/mL, 3.13 µg/mL, 6.25 µg/mL, 12.5 µg/mL, 25 µg/mL, 50 µg/mL; (B) ICG concentration and UV absorption standard curve.

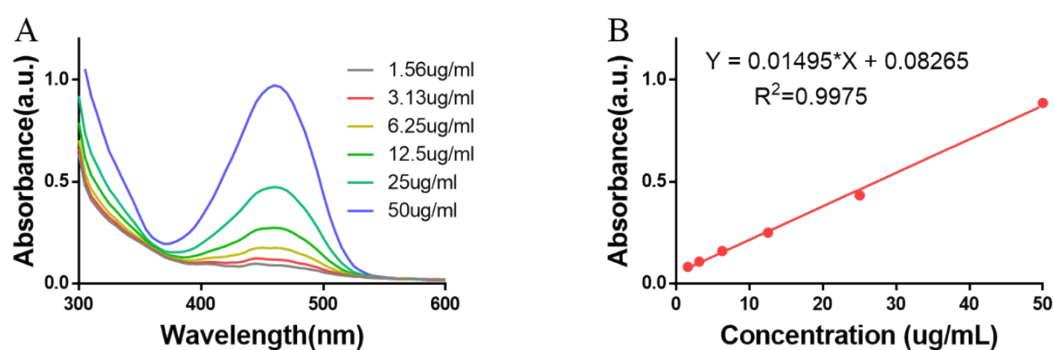

**Figure S4.** (A) UV-vis absorption spectrum of TPZ content of 1.56 µg/mL, 3.13 µg/mL, 6.25 µg/mL, 12.5 µg/mL, 25 µg/mL, 50 µg/mL; (B) TPZ concentration and UV absorption standard curve.

**Table 1.** The drug-loaded rate of nanoparticles

| Nanoparticle | Loading drug system |          |          |                    | Loading TPZ |          | Loading ICG |          |
|--------------|---------------------|----------|----------|--------------------|-------------|----------|-------------|----------|
|              | MSN (mg)            | TPZ (mg) | ICG (mg) | Solvent(water, mL) | TPZ (mg)    | Rate (%) | ICG (mg)    | Rate (%) |
| IT@MSN       | 40                  | 1        | 4        | 4                  | 0.8         | 2        | 3.5         | 8.75     |
| IT@MSN@RBCM  | 20                  | 0.5      | 2        | 2                  | 0.35        | 1.75     | 1.6         | 8        |
| IT@MSN@TM    | 20                  | 0.5      | 2        | 2                  | 0.36        | 1.8      | 1.6         | 8        |
| IT@MSN@RTM   | 40                  | 0.5      | 2        | 2                  | 0.35        | 1.7      | 1.65        | 8.25     |
| T@MSN@RTM    | 20                  | 0.5      | 0        | 2                  | 0.45        | 2.25     | 0           | 0        |
| I@MSN@RTM    | 20                  | 0        | 2        | 4                  | 0           | 0        | 1.85        | 9.25     |

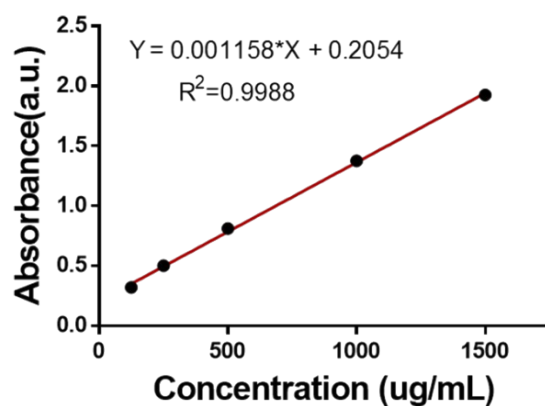

**Figure S5.** ABS protein quantitative concentration and UV absorption standard curve.

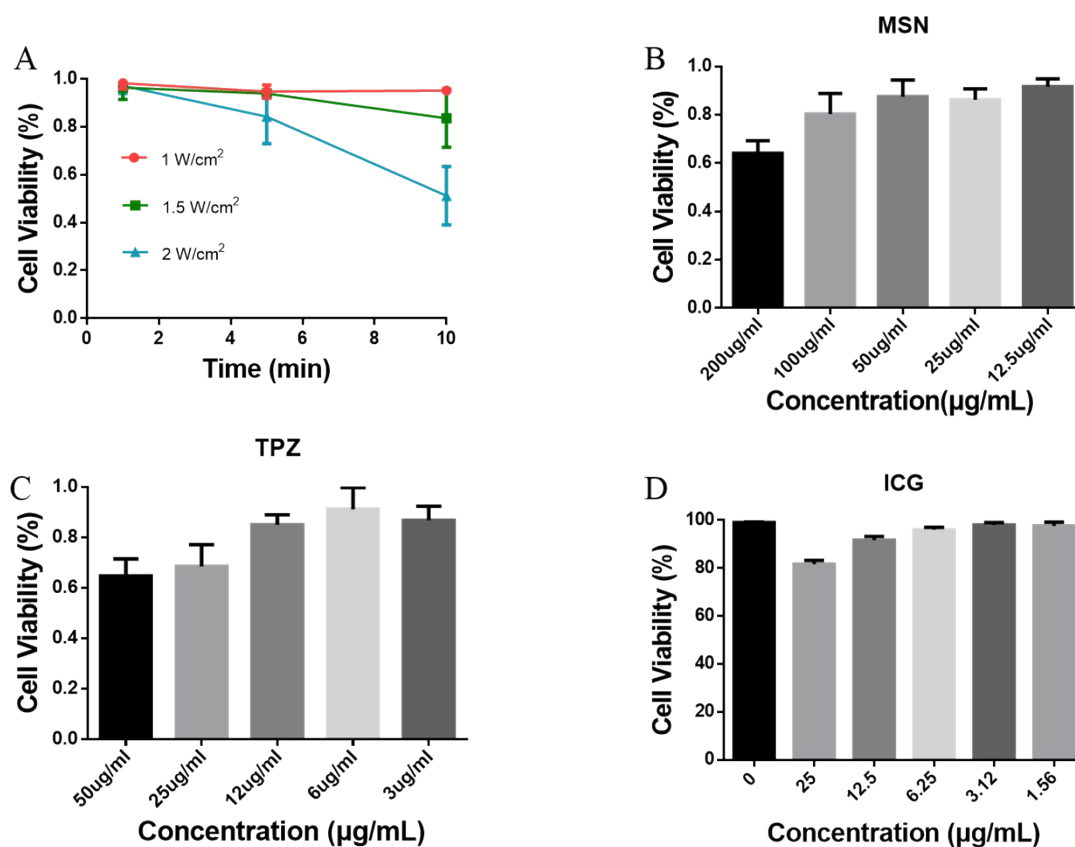

**Figure S6.** (A) Research on laser safety conditions; (B) MSN safety research; (C) free TPZ security exploration, (D) free ICG security exploration.

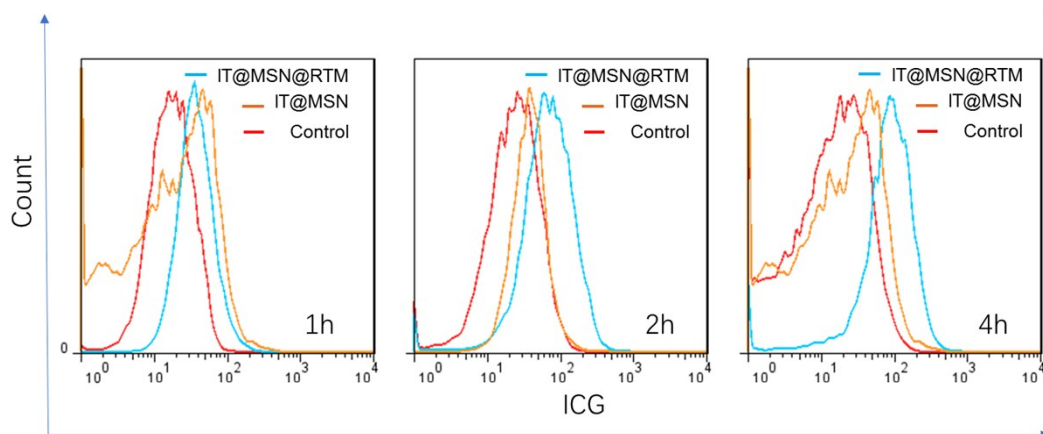

**Figure S7.** Flow cytometric analysis of 4T1 cells phagocytosing nanoparticles with controls as controls (red line), IT @ MSN @ RTM (yellow line), IT @ MSN (blue line).

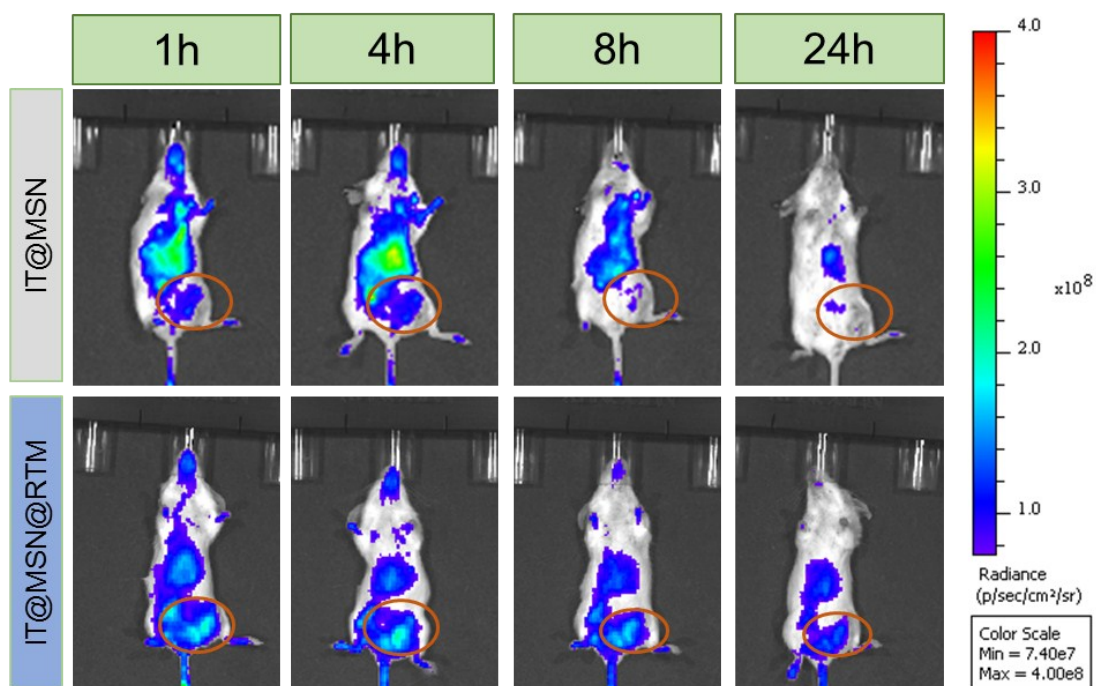

**Figure S8.** In vivo imaging of tumor in BALB/c. ICG@MSN and ICG@MSN@RTM nanoparticles were injected into the 4T1 tumor-bearing mice model by caudal vein and in vivo imaging was used for detecting the fluorescence at 1h, 4h, 8h, 24 h.

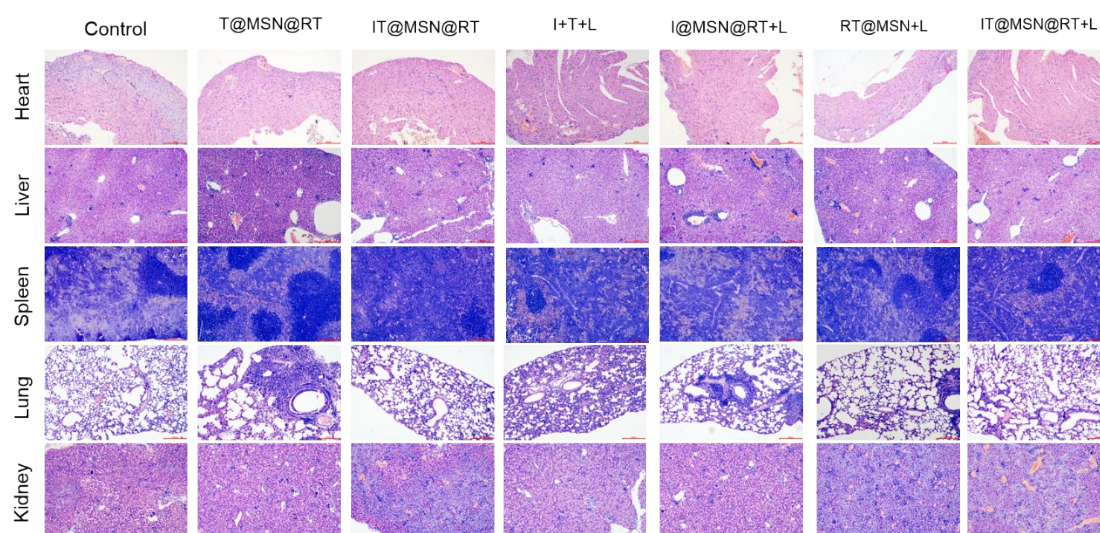

**Figure S9.** H&E-stained slices of major organs including heart, liver, spleen, lung, and kidney from each group. Tumor-bearing mice without any treatment were used as a control. Scale bar=200  $\mu$ m.
